# Supplementary material
Source: PubMed Central journal article supplement (PMC5966592)
Supplement: rspb20180160supp1.pdf [file rspb20180160supp1.pdf]

## **Supplemental Information**

### **Epigenetic regulation of transcriptional plasticity is associated with developmental song learning**

Theresa K Kelly, Somayeh Ahmadiantehrani, Adam Blattler, Sarah E London

**SUPPLEMENTAL FIGURES AND TABLES**

**Figure S1.** Modified screenshot of UCSC Genome Browser showing custom tracks of H3K9me3, H3K27me3, H3K4me3, and Pol2 data for Tutored and Isolate auditory forebrain. Note H3K4me3 and Pol2 are located proximal to the transcriptional start sites (gene models in blue at the bottom); H3K9me3 and H3K27me3 peaks are broader and more distal to gene bodies.

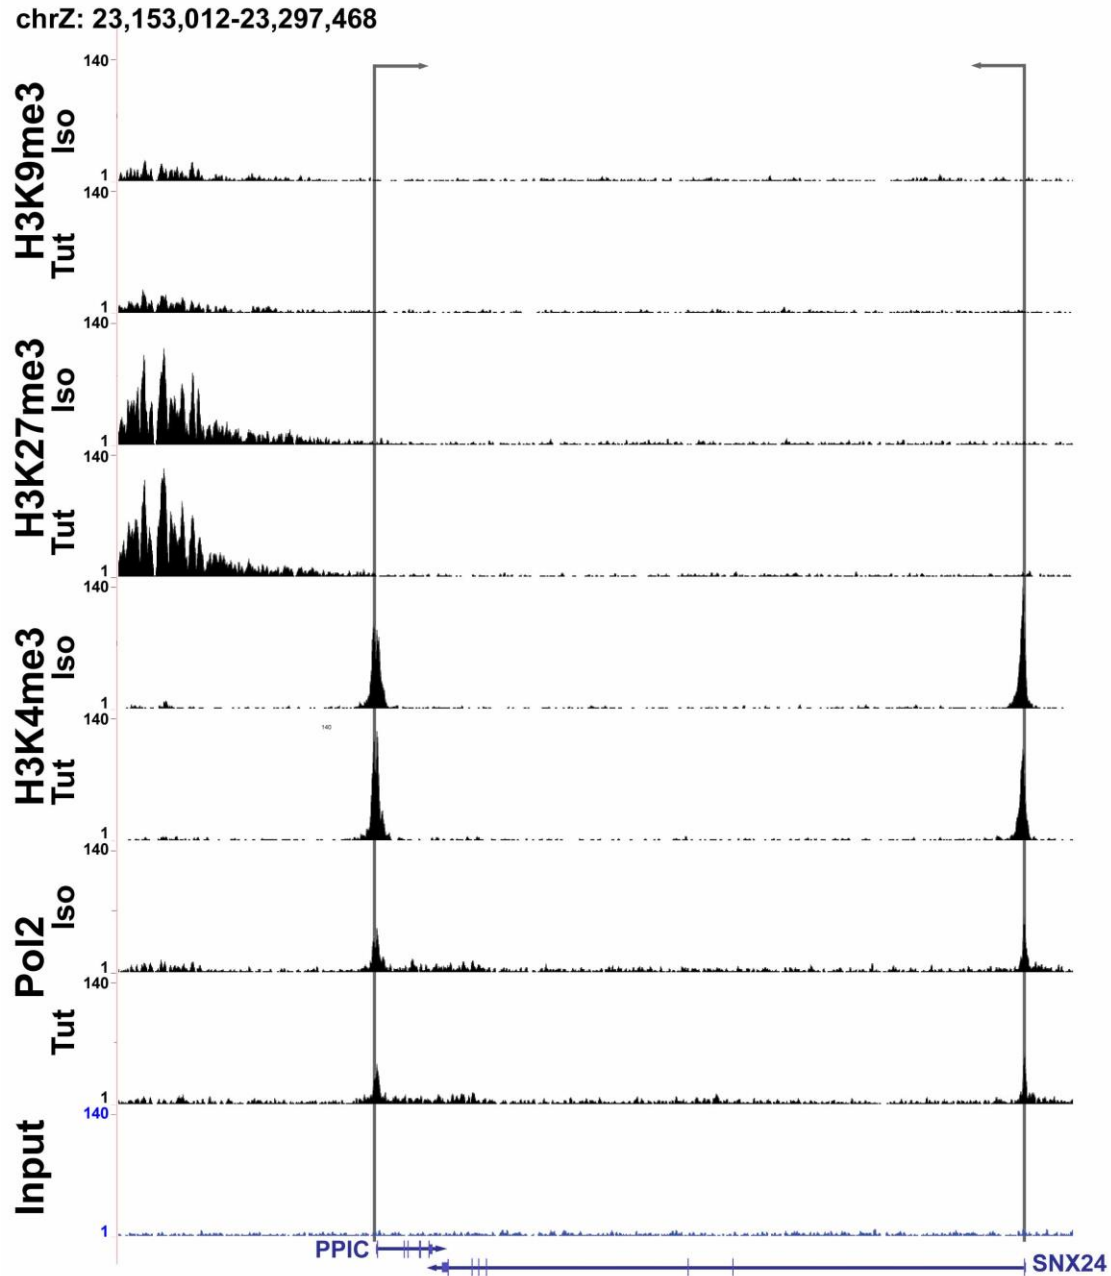

**Figure S2.** Pearson Correlation Coefficients demonstrate higher correlations of read count density within called peaks between two markers of active chromatin, H3K4me3 and Pol2, and between two markers of repressed chromatin, H3K9me3 and H3K27me3, than across active and repressed data. For example, the correlation between H3K4me3 and Pol2 Isolate data is 0.74, but only 0.297 between H3K4me3 and H3K9me3 Isolate data. I.1 = Isolate, T.1 = Tutored.

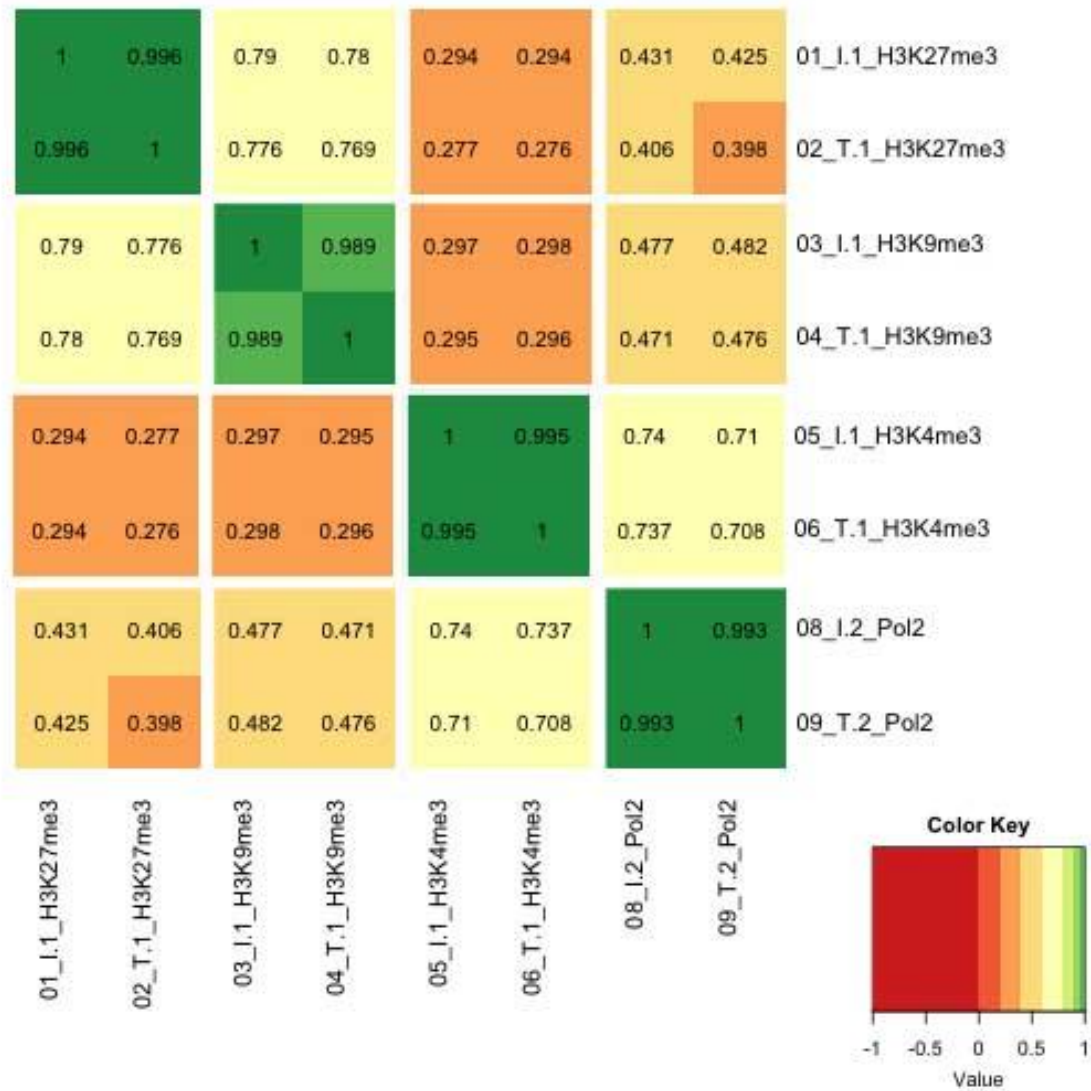

**Figure S3.** A second replicate of ChIPseq with an independent set of P67 Tutored and Isolate birds confirms central findings. (A) Song similarity scores are higher for Tutored than Isolate birds (t-test  $p = 0.02$ ). Shown is the highest of the three possible scores for each Isolate. Symbols designate which tutor comparison is depicted, and the numbers on the graphs indicate the quantitative difference in song similarity score between the Tutored-tutor and Isolate-tutor analyses when they are evaluated against the same tutor bird. (B) Scatterplots of the number of reads (x and y axes) per called peak positions (dots) for Replicate 1 and Replicate 2 ChIPseq data. PC = Pearson Correlation Coefficients demonstrating high correspondence between the two datasets. (C) Screenshots of from UCSC Genome Browser illustrating the highly-similar patterns of ChIPseq read distributions between Replicate 1 Tutored (top row), Replicate 1 Isolate (second row down), Replicate 2 Tutored (third row down) and Replicate 2 Isolate (bottom row). Top left = H3K9me3, top right = H3K27me3, bottom left = H3K4me3, bottom right = Pol2. (D) The number of genes that were differentially associated with H3K9me3, H3K27me3, H3K4me3 and Pol2 in Replicate 2 verify the finding that more genes are associated with H3K9me3 and H3K27me3 modifications in the Tutored compared to the Isolate auditory forebrain, and that more genes are associated with H3K4me3 and Pol2 in the Isolate compared to the Tutored auditory forebrain. The number of Isolate and Tutored genes differentially associated with H3K9me3 (Tutored: 691, Isolate: 322), H3K27me3 (Tutored: 413, Isolate: 314), H3K4me3 (Tutored: 391, Isolate: 1374), and Pol2 (Tutored: 212, Isolate: 2422) in Replicate 2. \* designates significantly different proportions at  $p < 0.01$ .

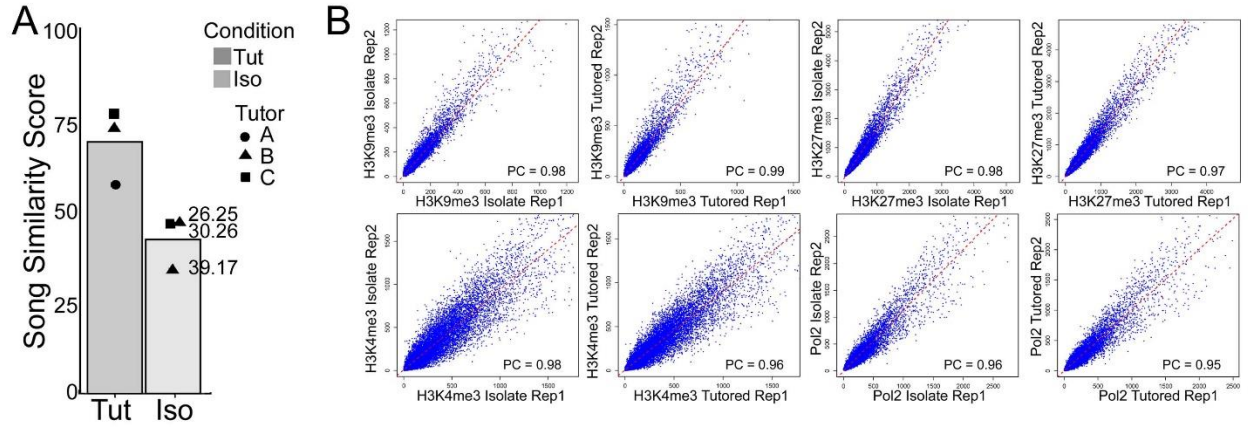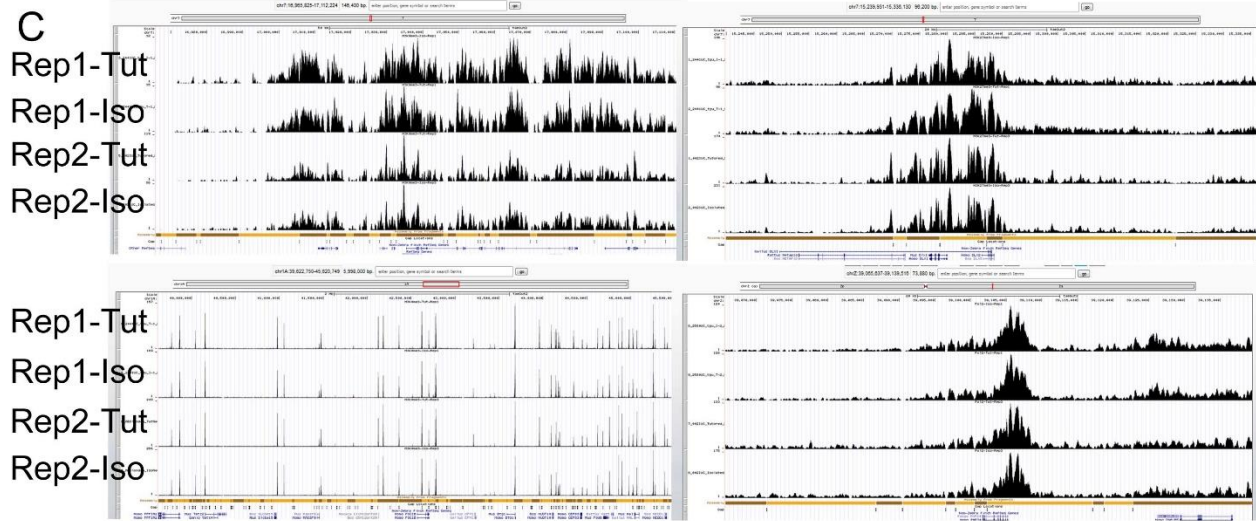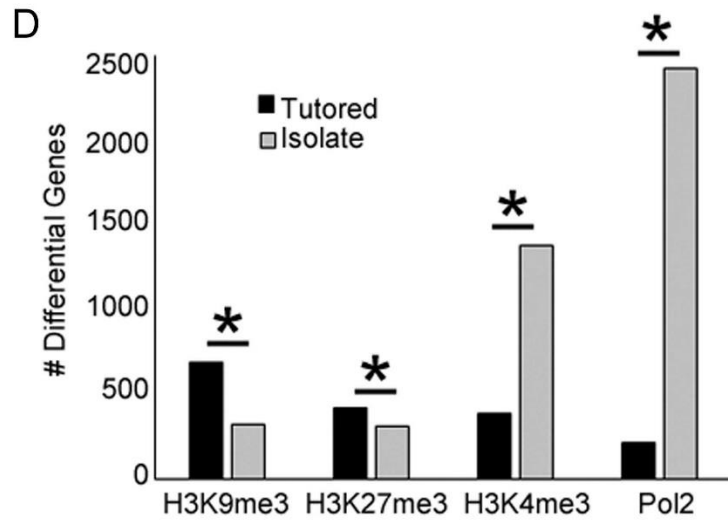

**Table S1.** Biological ChIPseq replicate GO categories at Fisher's test of adjusted p-values ( $\alpha < 0.05$ ).

Significantly underrepresented are designated with \*.

| GO ID             | GO description                                                       | Expected | Observed | Adj. Fisher |
|-------------------|----------------------------------------------------------------------|----------|----------|-------------|
| <b>Isolate-on</b> |                                                                      |          |          |             |
| GO:0005634        | nucleus                                                              | 1017     | 1247     | 7.60E-23    |
| GO:0004930        | G-protein coupled receptor activity                                  | 192      | 95       | 9.90E-20 *  |
| GO:0007186        | G-protein coupled receptor signaling pathway                         | 250      | 142      | 8.60E-19 *  |
| GO:0005739        | mitochondrion                                                        | 361      | 482      | 1.20E-15    |
| GO:0004871        | signal transducer activity                                           | 236      | 143      | 2.10E-14 *  |
| GO:0004872        | receptor activity                                                    | 268      | 170      | 3.70E-14 *  |
| GO:0005737        | cytoplasm                                                            | 833      | 992      | 9.80E-13    |
| GO:0003677        | DNA binding                                                          | 408      | 514      | 2.70E-10    |
| GO:0005515        | protein binding                                                      | 2499     | 2703     | 2.70E-10    |
| GO:0016021        | integral to membrane                                                 | 816      | 682      | 4.40E-09 *  |
| GO:0007165        | signal transduction                                                  | 422      | 324      | 7.30E-09 *  |
| GO:0006334        | nucleosome assembly                                                  | 30       | 55       | 2.80E-07    |
| GO:0000786        | nucleosome                                                           | 27       | 49       | 1.30E-06    |
| GO:0045944        | positive regulation of transcription from RNA polymerase II promoter | 177      | 231      | 1.80E-05    |
| GO:0005694        | chromosome                                                           | 37       | 61       | 3.10E-05    |
| GO:0005200        | structural constituent of cytoskeleton                               | 52       | 26       | 0.00025 *   |
| GO:0043565        | sequence-specific DNA binding                                        | 194      | 244      | 0.00027     |
| GO:0003676        | nucleic acid binding                                                 | 432      | 360      | 0.00033 *   |
| GO:0008270        | zinc ion binding                                                     | 626      | 545      | 0.001 *     |
| GO:0003964        | RNA-directed DNA polymerase activity                                 | 14       | 2        | 0.0022 *    |
| GO:0006278        | RNA-dependent DNA replication                                        | 14       | 2        | 0.0022 *    |
| GO:0006355        | regulation of transcription, DNA-dependent                           | 302      | 357      | 0.003       |
| GO:0005882        | intermediate filament                                                | 64       | 38       | 0.003 *     |
| GO:0005813        | centrosome                                                           | 77       | 104      | 0.009       |
| GO:0008284        | positive regulation of cell proliferation                            | 78       | 104      | 0.019       |
| GO:0003700        | sequence-specific DNA binding transcription factor activity          | 233      | 277      | 0.02        |
| GO:0045892        | negative regulation of transcription, DNA-dependent                  | 100      | 128      | 0.028       |
| GO:0006139        | nucleobase-containing compound metabolic process                     | 19       | 32       | 0.032       |
| GO:0005730        | nucleolus                                                            | 111      | 140      | 0.035       |
| GO:0005874        | microtubule                                                          | 39       | 56       | 0.038       |
| GO:0010212        | response to ionizing radiation                                       | 9        | 18       | 0.038       |
| GO:0006352        | transcription initiation, DNA-dependent                              | 9        | 18       | 0.038       |
| GO:0022625        | cytosolic large ribosomal subunit                                    | 15       | 26       | 0.041       |
| GO:0005829        | cytosol                                                              | 125      | 155      | 0.042       |
| <b>Tutored-on</b> |                                                                      |          |          |             |
| GO:0000786        | nucleosome                                                           | 5        | 31       | 3.60E-16    |
| GO:0006334        | nucleosome assembly                                                  | 5        | 31       | 2.10E-14    |
| GO:0005694        | chromosome                                                           | 6        | 33       | 2.20E-13    |
| GO:0045653        | negative regulation of megakaryocyte differentiation                 | 0        | 6        | 0.00012     |

**Table S2.** Gene Ontology Molecular Function and Biological Process categories, as well as Panther Protein Classes, represented in all datasets show overlap between datasets that predict greater transcription in Tutored-on and Isolate-on gene sets. “y” indicates that a particular dataset is represented for the functional category in each row.

|                                                                 | Tutored-on       |                   |                  |            | Isolate-on       |                   |                  |            |
|-----------------------------------------------------------------|------------------|-------------------|------------------|------------|------------------|-------------------|------------------|------------|
|                                                                 | H3K9me3<br>- Iso | H3K27me3<br>- Iso | H3K4me3<br>- Tut | Pol2 - Tut | H3K9me3<br>- Tut | H3K27me3<br>- Tut | H3K4me3<br>- Iso | Pol2 - Iso |
| <b>molecular function</b>                                       |                  |                   |                  |            |                  |                   |                  |            |
| binding (GO:0005488)                                            | y                | y                 | y                | y          | y                | y                 | y                | y          |
| catalytic activity (GO:0003824)                                 | y                | y                 | y                | y          | y                | y                 | y                | y          |
| enzyme regulator activity (GO:0030234)                          | y                | y                 | y                | y          | y                | y                 | y                | y          |
| nucleic acid binding transcription factor activity (GO:0001071) | y                | y                 | y                | y          | y                | y                 | y                | y          |
| receptor activity (GO:0004872)                                  | y                | y                 | y                | y          | y                | y                 | y                | y          |
| structural molecule activity (GO:0005198)                       | y                | y                 | y                | y          | y                | y                 | y                | y          |
| translation regulator activity (GO:0045182)                     |                  |                   | y                |            | y                | y                 | y                | y          |
| transporter activity (GO:0005215)                               | y                | y                 | y                | y          | y                | y                 | y                | y          |
| channel regulator activity (GO:0016247)                         |                  |                   |                  |            |                  | y                 |                  | y          |
| protein binding transcription factor activity (GO:0000988)      |                  | y                 | y                | y          |                  | y                 | y                | y          |
| antioxidant activity (GO:0016209)                               |                  |                   |                  |            |                  |                   | y                | y          |
| <b>biological process</b>                                       |                  |                   |                  |            |                  |                   |                  |            |
| apoptotic process (GO:0006915)                                  | y                | y                 | y                | y          | y                | y                 | y                | y          |
| biological adhesion (GO:0022610)                                | y                | y                 | y                | y          | y                | y                 | y                | y          |
| biological regulation (GO:0065007)                              | y                | y                 | y                | y          | y                | y                 | y                | y          |
| cellular component organization or biogenesis (GO:0071840)      | y                | y                 | y                | y          | y                | y                 | y                | y          |
| cellular process (GO:0009987)                                   | y                | y                 | y                | y          | y                | y                 | y                | y          |
| developmental process (GO:0032502)                              | y                | y                 | y                | y          | y                | y                 | y                | y          |
| immune system process (GO:0002376)                              | y                | y                 | y                | y          | y                | y                 | y                | y          |
| localization (GO:0051179)                                       | y                | y                 | y                | y          | y                | y                 | y                | y          |
| locomotion (GO:0040011)                                         |                  |                   | y                | y          |                  | y                 | y                | y          |
| metabolic process (GO:0008152)                                  | y                | y                 | y                | y          | y                | y                 | y                | y          |
| multicellular organismal process (GO:0032501)                   | y                | y                 | y                | y          | y                | y                 | y                | y          |
| reproduction (GO:0000003)                                       | y                | y                 | y                | y          |                  | y                 | y                | y          |
| response to stimulus (GO:0050896)                               | y                | y                 | y                | y          | y                | y                 | y                | y          |
| <b>protein class</b>                                            |                  |                   |                  |            |                  |                   |                  |            |
| calcium-binding protein (PC00060)                               |                  | y                 | y                | y          | y                | y                 | y                | y          |
| cell adhesion molecule (PC00069)                                | y                | y                 | y                | y          | y                | y                 | y                | y          |
| cell junction protein (PC00070)                                 |                  | y                 | y                | y          | y                | y                 | y                | y          |
| chaperone (PC00072)                                             |                  |                   | y                |            |                  | y                 | y                | y          |
| cytoskeletal protein (PC00085)                                  | y                | y                 | y                | y          | y                | y                 | y                | y          |
| defense/immunity protein (PC00090)                              | y                | y                 | y                | y          | y                | y                 | y                | y          |
| enzyme modulator (PC00095)                                      | y                | y                 | y                | y          | y                | y                 | y                | y          |
| extracellular matrix protein (PC00102)                          | y                | y                 | y                | y          | y                | y                 | y                | y          |
| hydrolase (PC00121)                                             | y                | y                 | y                | y          | y                | y                 | y                | y          |
| isomerase (PC00135)                                             |                  |                   | y                | y          | y                | y                 | y                | y          |
| kinase (PC00137)                                                |                  | y                 | y                | y          | y                | y                 | y                | y          |
| ligase (PC00142)                                                |                  |                   | y                | y          | y                | y                 | y                | y          |
| lyase (PC00144)                                                 |                  |                   | y                |            |                  | y                 | y                | y          |

|                                                             |   |   |   |   |   |   |   |   |
|-------------------------------------------------------------|---|---|---|---|---|---|---|---|
| membrane traffic protein (PC00150)                          | y | y | y | y | y | y | y | y |
| nucleic acid binding (PC00171)                              | y | y | y | y | y | y | y | y |
| oxidoreductase (PC00176)                                    | y | y | y | y | y | y | y | y |
| phosphatase (PC00181)                                       | y | y | y | y | y | y | y | y |
| protease (PC00190)                                          | y | y | y | y | y | y | y | y |
| receptor (PC00197)                                          | y | y | y | y | y | y | y | y |
| signaling molecule (PC00207)                                | y | y | y | y | y | y | y | y |
| storage protein (PC00210)                                   |   |   |   |   |   | y | y |   |
| structural protein (PC00211)                                |   |   |   | y |   | y | y | y |
| surfactant (PC00212)                                        | y |   | y | y | y | y | y | y |
| transcription factor (PC00218)                              | y | y | y | y | y | y | y | y |
| transfer/carrier protein (PC00219)                          | y | y | y | y | y | y | y | y |
| transferase (PC00220)                                       |   | y | y | y | y | y | y | y |
| transmembrane receptor regulatory/adaptor protein (PC00226) | y | y | y | y |   | y | y | y |
| transporter (PC00227)                                       | y | y | y | y | y | y | y | y |



**Figure S4. High individual gene specificity represents similar biological processes - but in opposite directions - across Tutored and Isolate datasets.** Ingenuity Pathway Analysis of biological processes showed a large overlap in the functional processes represented in ChIPseq genesets, as indicated by numbers indicating the same process in Tutored-on (left panel, top) and Isolate-on (left panel, bottom), but with predicted gene expression patterns in opposite directions (orange is upregulated, blue is downregulated; color intensity indicates magnitude of difference). An example of the array of genes contained within one of these differential processes, Development of Neurons, is circled in the left panels and displayed in more detail in the right panels. Right panels illustrate that nearly all genes are either relatively up- (red symbols) or down-regulated (green symbols) in Isolate and Tutored samples, respectively. Gray diagonal lines simply visually connect the gene nodes with the main function, development of neurons. Categories identified in left panel are: 1 : organismal development, 2 : tissue development, 3 : gastrointestinal disease, 4 : embryonic development, 5 : skeletal and muscular system development, 6 : cellular growth and proliferation, 7 : organ development, 8 : tissue, morphology, 9 : cellular development, 10 : nervous system development, 11 : cardiovascular development, 12 : cellular movement, 13 : developmental disorder, 14 : connective tissue development, 15 : cellular function, 16 : gene expression, 17 : cellular assembly and organization, 18 : cardiovascular disease, 19 : respiratory disease, 20 : organ morphology.

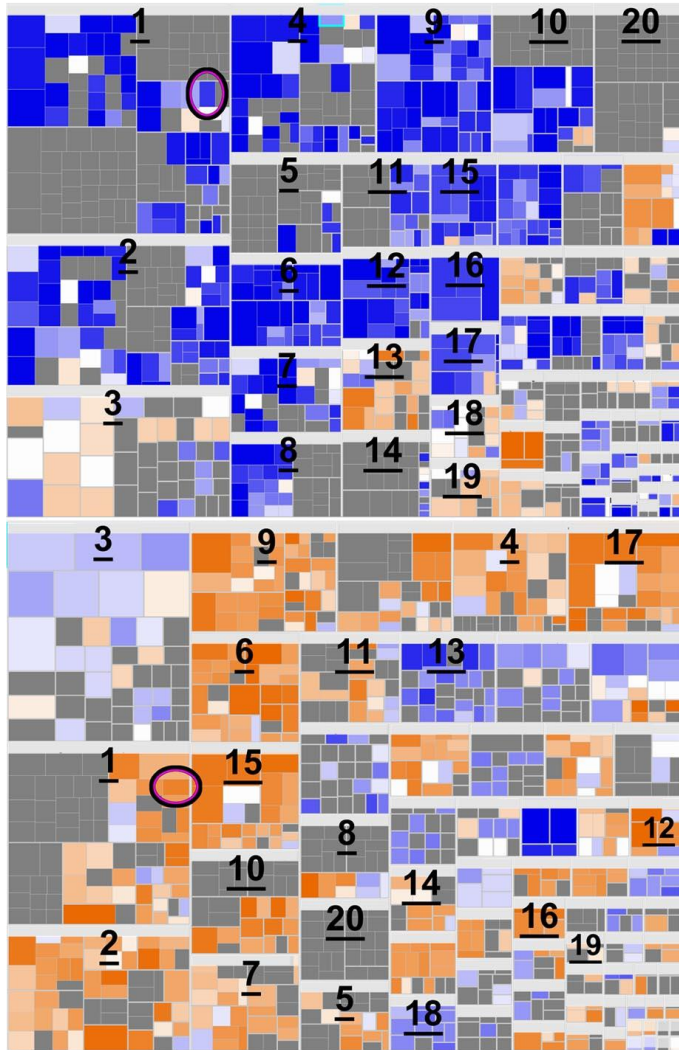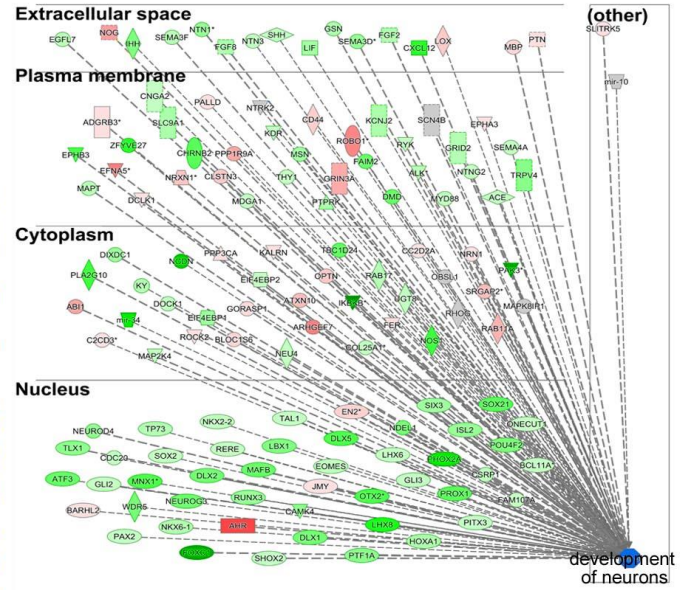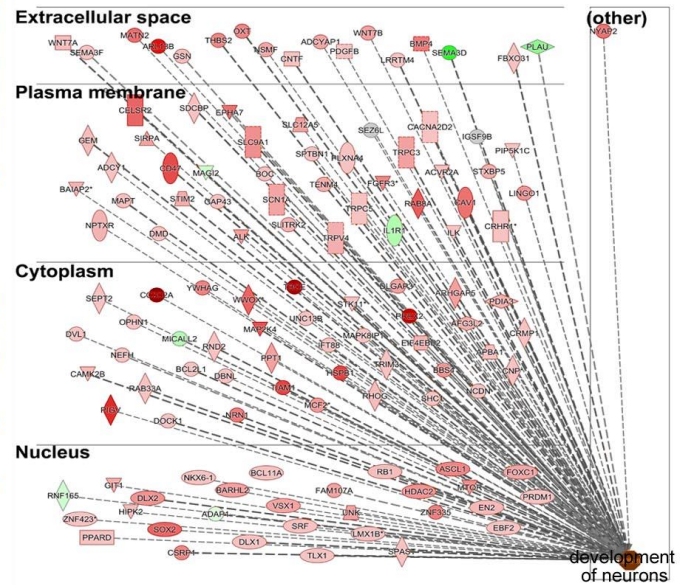

**Table S3.** List of genes that comprise the Development of Neurons category in IPA analysis.

| Tutored |          |         |        | Isolate |          |          |
|---------|----------|---------|--------|---------|----------|----------|
| SOX21   | PAX2     | CDLK1   | LIF    | FOXC1   | PPT1     | SLC9A1   |
| ONECUT  | FOXC1    | ADGRB3  | GSN    | PRDM1   | TIAM1    | BOC      |
| SIX3    | SHOX1    | ZFYVE27 | SEMA3D | ASCL1   | MCF2     | SCN1A    |
| ISL2    | PTF1A    | NRXN1   | FGF2   | MTOR    | CC2C2A   | SLITRK2  |
| POU4F2  | MAP2K4   | CNGA2   | CXCL12 | EN2     | MAP2K4   | TRPV4    |
| BCL11A  | C2CD3    | SLC9A1  | LOX    | EBF2    | HSPB1    | SLC12A5  |
| EN2     | ABI1     | CHRN2   | MBP    | RB1     | RHOG     | SPTBN1   |
| NDEL1   | mir-34   | SLSTN3  | PTN    | HDAC2   | YWHAG    | TENM4    |
| PHOX2A  | PLA2G10  | MDGA1   |        | ZNF335  | WWOX     | TRPC5    |
| CSRP1   | DIXDC1   | PALLD   |        | BCL11A  | UNC13B   | IL1R1    |
| FAM107A | ROCK2    | PPP1R9A |        | FAM107A | IFT88    | PLXNA4   |
| TAL1    | BLOC1S6  | THY1    |        | NKX6-1  | TBCE     | FGFR3    |
| DLX5    | NEU4     | PTPRK   |        | BARHL2  | MAPK8IP1 | SEZ6L    |
| LHX6    | EIF4EBP4 | NTRK2   |        | VSX1    | TRIM3    | TRPC3    |
| NKX2-2  | DOCK1    | KDR     |        | UNK     | SHC1     | RAB8A    |
| LBX1    | KY       | MSN     |        | GIT1    | STK11    | CACNA2D2 |
| EOMES   | NCDN     | GRIN3A  |        | DLX2    | EIF4EBP2 | ACVR2A   |
| GLI3    | GORASP1  | CD44    |        | ADAP1   | BBS4     | CAV1     |
| POX1    | PRP3CA   | ROBO1   |        | SRF     | NCDN     | IGSF9B   |
| TP73    | EIFEBP2  | FAIM2   |        | LMX1B   | DLGAP3   | STXBP5   |
| RERE    | ATXN10   | DMD     |        | RNF165  | PREX2    | CRHR1    |
| NEUROD4 | ARGHEF7  | KCNJ2   |        | HIPK2   | ARHGAP5  | PIP5K1C  |
| MAFB    | COL25A1  | RYK     |        | ZNF423  | AFG3L2   | LINGO1   |
| JMY     | KALRN    | ALK     |        | PPARD   | APBA1    | WNT7A    |
| OTX2    | OPTN     | MYD88   |        | SOX2    | CNP      | SEMA3F   |
| PITX3   | IKBKB    | SCN4B   |        | CSRP1   | PDIA3    | MATN2    |
| TLX1    | FER      | GRID2   |        | DLX1    | CRMP1    | ARL13B   |
| CDC20   | NOS1     | NTNG2   |        | TLX1    | NPTXR    | GSN      |
| DLX2    | TBC1D24  | ACE     |        | SPAST   | BAIAP2   | THBS2    |
| MNX1    | RAB17    | EPHA3   |        | PIGV    | MAPT     | OXT      |
| RUNX3   | UGT8     | SEMA4A  |        | DOCK1   | DMD      | NSMF     |
| ATF3    | CC2D2A   | TRPV4   |        | CAMK2B  | GEM      | CNTF     |
| GLI2    | OBSL1    | mir-10  |        | RAB33A  | ADCY1    | ADCYAP1  |
| NEUROG3 | RHOG     | SLITRK5 |        | NRN1    | CELSR2   | PDGFB    |
| CAMK4   | NRN1     | EGFL7   |        | DVL1    | SIRPA    | WNT7B    |
| LHX8    | SRGAR2   | NOG     |        | NEFH    | CD47     | LRRTM4   |
| WDR5    | RAB11A   | IHH     |        | BCL2L1  | STIM2    | BMP4     |
| BARHL2  | PAK3     | SEMA3F  |        | DBNL    | GAP43    | SEMA3D   |
| NKX6-1  | MAPK8IP1 | NTN1    |        | OPHN1   | ALK      | FBXO31   |
| AHR     | MAPT     | FGF8    |        | SEPT2   | MAGI2    | PLAU     |
| DLX1    | EPHB3    | NTN3    |        | MICALL2 | SDCBP    | NYAP2    |
| HOXA1   | EFNA5    | SHH     |        | RND2    | EPHA7    |          |

**Table S5.** 350 genes of the Isolate-on overrepresented GO categories associated with transcription.

| Symbol  | Symbol   | Symbol  | Symbol   | Symbol   | Symbol   | Symbol  | Symbol  |
|---------|----------|---------|----------|----------|----------|---------|---------|
| SCAMP1  | TNIK     | H3F3B   | PTPRS    | TSHZ1    | FAM107A  | FAT2    | GLRB    |
| SOX3    | EBF2     | RPL11   | CLDN4    | POU2F3   | ZBTB8A   | RORB    | ARR3    |
| RAP1A   | THBS2    | CDK10   | CREBRF   | PKM      | TLX1     | NTM     | JMJD6   |
| REEP5   | DDX41    | PCGF5   | SRSF6    | KIF21A   | MSX1     | ATR     | ARIH2   |
| BNIP1   | FAF2     | ACAT2   | ANKRD44  | BARHL2   | YWHAQ    | CHD1L   | RBBP4   |
| NUP35   | FGF1     | PCBD2   | DNAJB5   | IMP3     | PKP1     | TRPC5   | WDR73   |
| HMGN5   | CDC23    | SDCBP2  | PHF5A    | COMMD5   | PHC1     | NAA50   | KDM2A   |
| RPF2    | USP7     | PTK7    | VPS11    | CC2D2A   | AFG3L2   | GAP43   | ZBTB25  |
| ISCU    | EIF4EBP2 | BCL2L1  | POLE3    | FGFR3    | SDCBP    | GIT2    | DLX6    |
| ATP5F1  | ANKRD66  | CTNBL1  | PODN     | MTF1     | SNX33    | WASF2   | SYT2    |
| ANKRD49 | RAB33A   | TRAIP   | TWIST1   | SF3B3    | INTS1    | PSMB2   | GLYCTK  |
| NFU1    | TDRD7    | PRKDC   | FHL1     | CCNG1    | TCEANC2  | LIN28A  | WIP1    |
| YWHAG   | STK16    | BAP1    | CADPS    | EXOC8    | DNAI1    | P4HA2   | ZNF319  |
| HMOX2   | MID2     | FUBP1   | OPHN1    | SLC9A3R2 | SIN3B    | BET1L   | CIAPIN1 |
| CIRBP   | MYO1D    | SPARC   | CORO1C   | TBL3     | CDC34    | CD47    | ACVR2B  |
| PRELID1 | RRAGA    | NKX2-5  | ADPRHL2  | CD72     | SUN2     | MOB2    | WDR18   |
| MDH2    | EXOSC1   | PLCL1   | MYCL     | PIAS4    | FAT3     | KCNA2   | TBXA2R  |
| EDF1    | TRIM63   | PCDH18  | CRMP1    | SRR      | ST14     | ZIC1    | RXRA    |
| PPIC    | KLHDC4   | HSPB1   | GATA6    | PIGO     | MYD88    | PLEKHO1 | GTF3C6  |
| SAT1    | VAC14    | HMG20B  | AP3M2    | RFX2     | MCM3     | KLHL17  | C4      |
| LSM4    | WTAP     | SMTNL2  | LRRTM4   | WNT8A    | EXOC7    | NKX6-3  | GRIK2   |
| MED6    | DDB1     | SEMA3D  | SAMD13   | ETS1     | CDC27    | RAX2    | DVL1    |
| DRD2    | HM13     | VANGL1  | GAN      | TRIL     | NIPA2    | DARS    | ELOVL6  |
| ADARB2  | ANAPC1   | SETD1B  | SIGMAR1  | MTOR     | NSUN2    | SGCD    | RRP8    |
| TLN1    | CBX4     | YARS    | AP2B1    | CAMK1    | MAPK8IP1 | HIPK2   | RSPO1   |
| APBA3   | SCNN1A   | RUNX3   | SERPINE2 | GJB3     | SPOCK1   | CBL     | RPL13   |
| APBA1   | FKBP5    | MC1R    | SOCS2    | CUTC     | SNX21    | FOPNL   | NUP160  |
| ADAM23  | TTC4     | MMS19   | NETO1    | XPO1     | IKZF2    | VAMP3   | CCND1   |
| SH2D3C  | STXBP5   | STK4    | GRHL3    | KDM5B    | NDUFB10  | ABCC1   |         |
| IL10RA  | PPP1R3C  | FOXO1   | RIC8A    | MYSM1    | BCOR     | EZH1    | EPHA1   |
| PER3    | ZNF462   | SIRT3   | RPS6KC1  | GINS4    | MMP15    | IGBP1   | SIN3A   |
| AP1G1   | NR2C2    | H3F3A   | KCNJ2    | CNN2     | MAP3K5   | SRSF2   | NMRK2   |
| ORAI1   | DHX57    | GNAI2   | TSR1     | WNT7A    | PRPF8    | PTPRU   | TRAPPC3 |
| MYOM3   | ANXA6    | BTBD17  | CSTF3    | TP73     | RNF44    | ARRB1   | TGFB3   |
| POLE2   | WT1      | ADIPOR1 | CHAF1A   | SPOCK2   | UNC13B   | SPTB    | GID8    |
| ZBTB1   | SHH      | PAK6    | RNF145   | BRPF1    | EPHA7    | PRDM6   | NEURL2  |
| ONECUT3 | EIF3A    | PITX1   | WDFY1    | EDA      | ILKAP    | GINS3   | CHD4    |
| RAB8A   | FOXL2    | FGF2    | LRRC3    | IMPDH2   | ZPR1     | ELAVL1  | SH3BP4  |
| GLA     | RGS10    | PRPF6   | RNF219   | SFN      | DERL1    | MIS12   | DAPK3   |
| WHRN    | HSPH1    | SAMD4A  | UBN2     | NCDN     | ERI3     | CORO6   | CSF     |
| HDAC2   | SPAST    | MRPL51  | XRN1     | RPN2     | MAFK     | TOR2A   | COASY   |
| ACTR5   | CRHBP    | CSRP1   | MTTP     | OSBPL10  | EIF2B3   | CRYAB   | ASPSCR1 |
| KLHDC1  | ARIH1    | SHMT1   | UBIAD1   | EVX1     | COMMD4   | TRIP4   | SOX7    |
| SRPX2   | DLX1     | LINGO1  | ING1     | MYO9A    | CNTFR    | MYH11   |         |

**Figure S5.** Descriptive plots of RNAseq analysis. Top is the MA plot of the log2 fold-change (log2FC) between Tutored and Isolate samples plotted according to the mean normalized read count per transcript. Red dots are transcripts with  $p < 0.1$ . Bottom graphs represent the read counts for individual Tutored and Isolate samples for a subset of transcripts; circles are individual data points and lines represent group means.

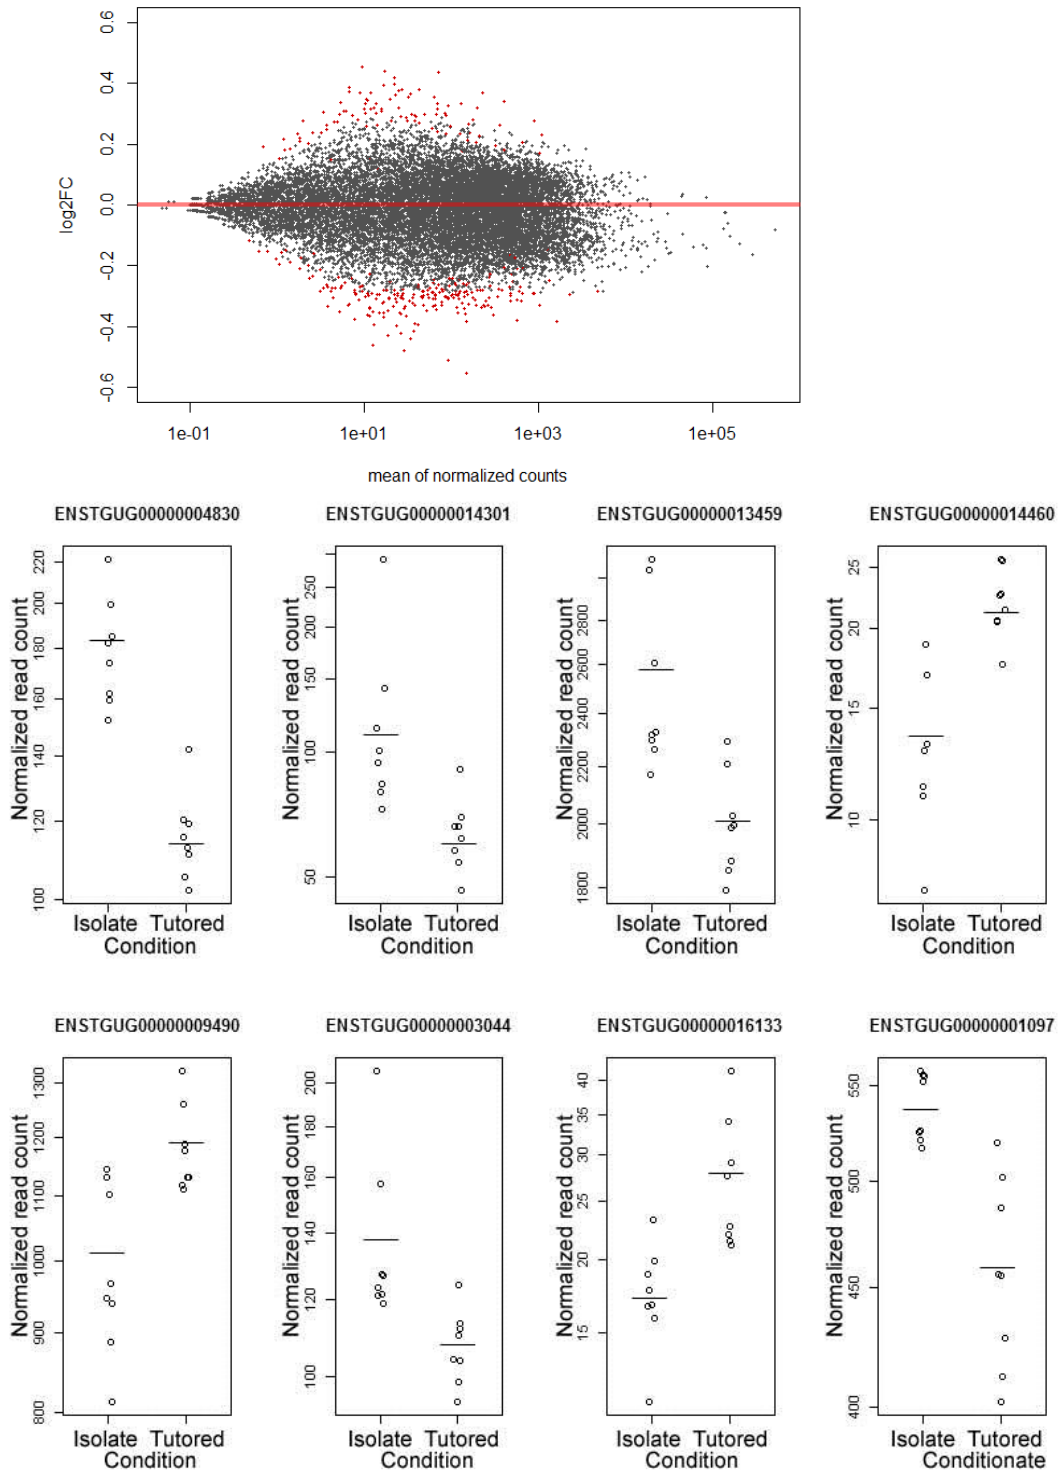

**Table S6.** RNAseq GO categories. The lowest adjusted p-value for RNAs more abundant in Isolate compared to Tutored (RNAseq\_Isolate) and those more abundant in Tutored (RNAseq\_Tutored) was 0.11. We therefore report these categories as non-statistically significant insight into functional categories, as we note that genomic and transcriptional regulation is represented in the RNAseq\_Isolate but not the RNAseq\_Tutored transcriptional profiles.

| GO                    | go_description                                       | expectation | observation | Adj.fisher |
|-----------------------|------------------------------------------------------|-------------|-------------|------------|
| <b>RNAseq_Isolate</b> |                                                      |             |             |            |
| GO:0006268            | DNA unwinding involved in replication                | 0           | 2           | 0.11       |
| GO:0003678            | DNA helicase activity                                | 0           | 2           | 0.11       |
| GO:0032508            | DNA duplex unwinding                                 | 0           | 2           | 0.11       |
| GO:0010629            | negative regulation of gene expression               | 0           | 3           | 0.11       |
| GO:0035267            | NuA4 histone acetyltransferase complex               | 0           | 2           | 0.11       |
| GO:0003697            | single-stranded DNA binding                          | 0           | 2           | 0.11       |
| GO:0006888            | ER to Golgi vesicle-mediated transport               | 0           | 2           | 0.11       |
| GO:0031668            | cellular response to extracellular stimulus          | 0           | 2           | 0.11       |
| GO:0032481            | positive regulation of type I interferon production  | 0           | 2           | 0.11       |
| GO:0050680            | negative regulation of epithelial cell proliferation | 0           | 3           | 0.11       |
| GO:0005576            | extracellular region                                 | 4           | 10          | 0.11       |
| GO:0050679            | positive regulation of epithelial cell proliferation | 0           | 3           | 0.11       |
| GO:0045600            | positive regulation of fat cell differentiation      | 0           | 2           | 0.11       |
| GO:0040014            | regulation of multicellular organism growth          | 0           | 2           | 0.11       |
| GO:0007165            | signal transduction                                  | 11          | 3           | 0.11       |
| GO:0045785            | positive regulation of cell adhesion                 | 0           | 2           | 0.11       |
| GO:0008219            | cell death                                           | 0           | 2           | 0.11       |
| GO:0004129            | cytochrome-c oxidase activity                        | 0           | 2           | 0.11       |
| GO:0005179            | hormone activity                                     | 1           | 3           | 0.11       |
| GO:0004872            | receptor activity                                    | 7           | 1           | 0.11       |
| GO:0006807            | nitrogen compound metabolic process                  | 0           | 2           | 0.11       |
| GO:0015630            | microtubule cytoskeleton                             | 1           | 3           | 0.11       |
| GO:0046332            | SMAD binding                                         | 0           | 2           | 0.11       |
| <b>GO</b>             |                                                      |             |             |            |
| <b>go_description</b> |                                                      |             |             |            |
| <b>expectation</b>    |                                                      |             |             |            |
| <b>observation</b>    |                                                      |             |             |            |
| <b>Adj.fisher</b>     |                                                      |             |             |            |
| <b>RNAseq_Tutored</b> |                                                      |             |             |            |
| GO:0019205            | nucleobase-containing compound kinase activity       | 0           | 2           | 0.1        |
| GO:0015293            | symporter activity                                   | 0           | 2           | 0.1        |
| GO:0005328            | neurotransmitter:sodium symporter activity           | 0           | 2           | 0.1        |
| GO:0006836            | neurotransmitter transport                           | 0           | 2           | 0.1        |
| GO:0016758            | transferase activity, transferring hexosyl groups    | 0           | 2           | 0.11       |

**Table S7.** Thirty-nine microRNA genes were differentially associated with PTM and Pol2 (list from ChIPseq Rep1).

|                         | <u>microRNA</u> |                     | <u>microRNA</u> |
|-------------------------|-----------------|---------------------|-----------------|
| <b>H3K27me3 Tutored</b> | MIR10A          | <b>Pol2 Tutored</b> | MIR128-2        |
|                         | MIR126          |                     | MIR25           |
|                         | MIR133-2        |                     | MIR551          |
|                         | MIR15C          | <b>Pol2 Isolate</b> | MIR135B         |
|                         | MIR16C          |                     | MIR137          |
|                         | MIR218-2        |                     | MIR139          |
|                         | MIR2188         |                     | MIR144          |
|                         | MIR2956-1       |                     | MIR17A          |
|                         | MIR2956-2       |                     | MIR18A          |
|                         | MIR2976-3       |                     | MIR19A          |
|                         | MIR2994         |                     | MIR19B-1        |
|                         | MIR34A          |                     | MIR20A          |
|                         | MIR375          |                     | MIR2970         |
|                         | MIR460A         |                     | MIR2976-3       |
|                         | MIR425          |                     |                 |
|                         | MIR451          |                     |                 |
|                         | MIR9-1          |                     |                 |
|                         | MIR92-1         |                     |                 |
| <b>H3K27me3 Isolate</b> | MIR2960         |                     |                 |
| <b>H3K4me3 Tutored</b>  | MIR2969         |                     |                 |
| <b>H3K4me3 Isolate</b>  | MIR135B         |                     |                 |
|                         | MIR146B         |                     |                 |
|                         | MIR15C          |                     |                 |
|                         | MIR16C          |                     |                 |
|                         | MIR223          |                     |                 |

**Table S8.** Position weight matrices based on genesets predictive of higher transcription in Isolate or Tutored auditory forebrain. Listed are transcription factor binding sites from Transfac and Jaspar databases that were unique for Isolate and Tutored genes (list from ChIPseq Rep1).

| <b>Transcription factor</b>                            | <b>TFBS</b>      |                                 |
|--------------------------------------------------------|------------------|---------------------------------|
| <b>Isolate</b>                                         |                  | * TF also in Isolate-on dataset |
| AR                                                     | V_AR_Q2          | ‡ TF also in Tutored-on dataset |
|                                                        | V_AR_Q3          |                                 |
|                                                        | V_AR_Q2          |                                 |
|                                                        | V_AR_Q6          |                                 |
| ATF1                                                   | V_ATF_B          |                                 |
| ATF1, ATF2, ATF3*, ATF4, ATF5, ATF6, ATF7, CREB1, CREM | V_CREBATEF_Q6    |                                 |
| ATF1, ATF2, ATF3*, ATF4, ATF7, CREB1, CREM             | V_CREB_Q3        |                                 |
| ATF2                                                   | V_CREBP1_Q2      |                                 |
| ATF2, JUN                                              | V_CREBP1CJUN_Q1  |                                 |
| BACH2                                                  | V_BACH2_Q1       |                                 |
| CEBPA                                                  | V_CEBP_C         |                                 |
|                                                        | V_CEBP_Q2        |                                 |
| CEBPA, CEBPB, CEBPD, CEBPE, CEBPG                      | V_CEBP_Q2_Q1     |                                 |
| CEBPB*                                                 | V_CEBPB_Q1       |                                 |
| CEBPG                                                  | V_CEBPGAMMA_Q6   |                                 |
| CREB1                                                  | V_CREB_Q1        |                                 |
|                                                        | V_CREB_Q2        |                                 |
|                                                        | V_CREB_Q4        |                                 |
| CREB1, CREM                                            | V_CREB_Q2_Q1     |                                 |
|                                                        | V_CREB_Q4_Q1     |                                 |
| CREB1, CREM, ATF1, ATF2, ATF3, ATF4, ATF7              | V_CREB_Q3        |                                 |
| CREB1, CREM, ATF1, ATF2, ATF3, ATF4, ATF5, ATF6, ATF7  | V_CREBATEF_Q6    |                                 |
| EGR3                                                   | V_EGR3_Q1        |                                 |
| FOS, FOSB, FOSL1, FOSL2, JUN, JUND                     | V_AP1_C          |                                 |
|                                                        | V_AP1_Q2         |                                 |
|                                                        | V_AP1_Q4         |                                 |
|                                                        | V_AP1_Q6         |                                 |
|                                                        | V_AP1FJ_Q2       |                                 |
| FOS, FOSB, FOSL1, FOSL2, JUN, JUNB, JUND               | V_AP1_Q1         |                                 |
|                                                        | V_AP1_Q2_Q1      |                                 |
|                                                        | V_AP1_Q4_Q1      |                                 |
|                                                        | V_AP1_Q6_Q1      |                                 |
| GATA2*                                                 | V_GATA2_Q1       |                                 |
|                                                        | V_GATA2_Q2       |                                 |
|                                                        | V_GATA2_Q3       |                                 |
| HLF                                                    | V_HLF_Q1         |                                 |
| HOXA9, MEIS1                                           | V_MEIS1AHOXA9_Q1 |                                 |
|                                                        | V_MEIS1BHOXA9_Q2 |                                 |
| HP1                                                    | V_HP1SITEFACTOR  |                                 |
| IRF1, IRF2, IRF3, IRF4*, IRF5, IRF6, IRF7, IRF8        | V_IRF_Q6         |                                 |
| IRF1, IRF2, IRF3, IRF4*, IRF5, IRF7, IRF8, IRF9        | V_IRF_Q6_Q1      |                                 |
| MAF                                                    | V_MAF_Q6         |                                 |
| MEF2A*                                                 | V_AMEF2_Q6       |                                 |



|                                              |                 |
|----------------------------------------------|-----------------|
| MEIS1                                        | V_MEF2_01       |
| NFATC1, NFATC2 <sup>‡</sup> , NFATC3, NFATC4 | V_MEF2_04       |
|                                              | V_MMEF2_Q6      |
|                                              | V_MEIS1_01      |
|                                              | V_NFAT_Q4_01    |
|                                              | V_NFAT_Q6       |
| NFE2L1                                       | V_TCF11_01      |
| NFIA, NFIC                                   | V_NF1_Q6_01     |
| NFKB1, NFKB2                                 | V_NFKB_C        |
| NFKB1, RELA                                  | V_NFKAPPAB_01   |
| NFYA, NFYB, NFYC                             | V_NFY_01        |
|                                              | V_NFY_Q6        |
|                                              | V_NFY_Q6_01     |
| NKX6-2                                       | V_NKX62_Q2      |
| NR1H2-RXR                                    | NR1H2-RXR       |
| NR3C1                                        | NR3C1           |
| PBX1                                         | V_PBX1_01       |
|                                              | V_PBX1_02       |
|                                              | V_PBX1_03       |
| PPARG*                                       | V_PPARG_01      |
|                                              | V_PPARG_02      |
| RELA                                         | V_NFKAPPAB65_01 |
| SOX9*                                        | V_SOX9_B1       |
| SRF*                                         | V_SRF_C         |
|                                              | V_SRF_Q4        |
|                                              | V_SRF_Q6        |
| STAT1                                        | V_STAT1_03      |
| vJUN                                         | V_VJUN_01       |
| XBP1                                         | V_XBP1_01       |
| <b>Tutored</b>                               |                 |
| ESR1 <sup>‡</sup> , ESR2                     | V_ER_Q6_02      |
| FOXO1                                        | V_FOXO1_01      |
| GATA2                                        | V_GATA2_02      |
| NFATC1, NFATC2 <sup>‡</sup> , NFATC3, NFATC4 | V_NFAT_Q4_01    |
| NFKB1                                        | V_NFKAPPAB50_01 |
| NFKB1, NFKB2, RELA                           | V_NFKB_Q6_01    |
| SRF                                          | V_SRF_01        |
|                                              | V_SRF_C         |

**Figure S6.** Cross-referencing Tutored and Isolate genesets with a database of RNAs enriched in distinct cell types ([https://web.stanford.edu/group/barres\\_lab/brain\\_rnaseq.html](https://web.stanford.edu/group/barres_lab/brain_rnaseq.html)) revealed that few, < 5%, of our genes were cell-type specific. Percent of each geneset is mapped below. The ratios of cell-type specific gene number compared to the Isolate-up and Tutored-up genesets (from ChIPseq Rep1) are: Neuron Isolate-up: 30/3181, Tutored-up: 6/628; Astrocyte Isolate-up: 86/3181, Tutored-up: 29/628; Myelinated oligodendrocyte (myelin.oligo) Isolate-up: 89/3181, Tutored-up: 11/628; microglia Isolate-up: 60/3181, Tutored-up: 7/628; endothelial cells Isolate-up: 116/3181, Tutored-up: 12/628.

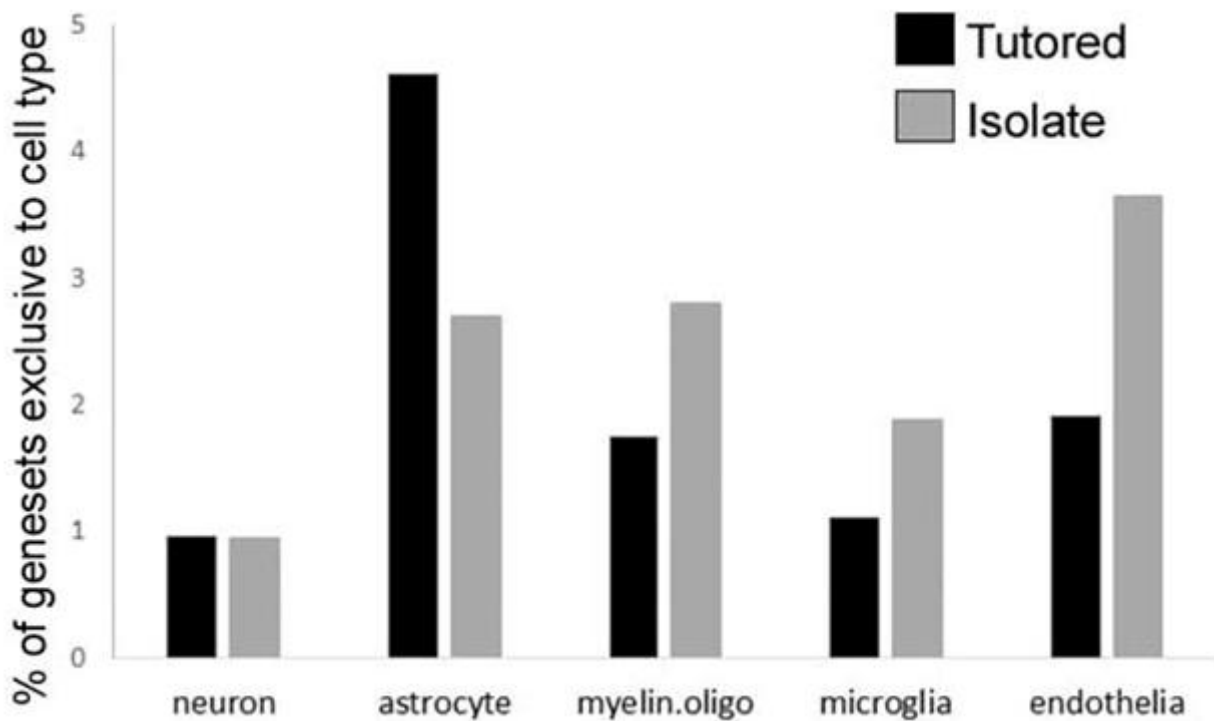

## **SUPPLEMENTAL EXPERIMENTAL PROCEDURES**

Procedures were in accordance with the National Institute of Health guidelines for the care and use of animals for experimental procedures and approved by the University of Chicago Institutional Animal Care and Use Committee (ACUP #72220).

### **P67 song analysis**

We recorded the birds with webcams placed unobtrusively within the housing chambers starting when the experimental birds were P65. We then played back these files in dedicated sound recording chambers, capturing song with Sound Analysis 2011 [1]. Sound files from the Tutored condition were manually sorted for the adult male tutor song and the Tutored male that lived with him. Isolate song bouts were also identified. Songs produced by birds P65-67 are still imprecisely structured but we could identify repeated syllable motifs for all experimental birds. One bout from each tutor was used for Asymmetric mean-value analysis and compared to 10 bouts each of the appropriate Tutored bird's song and each of the Isolate birds' songs. This analysis considers the adult tutor song as a template and quantifies how similar the juvenile's song is to it. We acquired song similarity scores for the Tutored birds by comparing 10 bouts of their recorded song to the song of the specific adult tutor male they lived with P30-67. We also compared 10 bouts of song produced by each Isolate bird with all of the adult tutor males used in each replicate of the experiment. By definition, there is no possible way that the Isolate songs can be copies of any of the adult tutors, so their similarity scores provide a measure of how similar a song can be to any one of the tutors based simply on conspecific acoustic patterning, given no possibility of learning. The expectation is that if Tutored birds were learning from their tutors, their song similarity scores would be significantly higher than any of the Isolate bird's were when compared to their tutor. The highest song similarity score was used for each Isolate bird in statistical testing. T-tests using song similarity scores at  $\alpha < 0.05$  were used to test that the Tutored songs were more similar to

the tutor's song than the Isolates', indicating distinct levels of song learning and therefore the association with a closed or open CP at P67.

### **ChIPseq**

The auditory forebrain is required for tutor song memorization [2-4]. The auditory forebrain is a discrete brain region visible with the naked eye and easily dissected [5-7]. It is neuroanatomically separable from, and projects to, areas within the motor circuitry including HVC and RA [7-9]. The auditory forebrain includes three major intricately interconnected subregions – field L (primary auditory cortex), and caudomedial nidopallium (NCM) and caudomedial mesopallium (CMM) which are functionally analogous to secondary auditory cortex - and heterogeneous cell types [7, 9]. Experiments that disrupt molecular signaling in as little as 15% of the secondary auditory forebrain prevent normal levels of tutor song copying in juvenile males [2, 3]. Thus, for this pioneering experiment, we assessed the chromatin profile in the entire area, as a functional unit.

For P67 Isolate and Tutored sample ChIPseq, we used 10 $\mu$ g chromatin with 5 $\mu$ l of antibody (Active Motif, #39161) for H3K9me3; 10 $\mu$ g chromatin with 4 $\mu$ g of antibody (Millipore, #07-449) for H3K27me3; 7 $\mu$ g chromatin with 3 $\mu$ l of antibody (Active Motif, #39159) for H3K4me3; and 10 $\mu$ g chromatin with 4  $\mu$ g of antibody (Abcam, #ab5095) for RNA Pol2. Prior to ChIP, antibodies were verified to bind in zebra finch brain with Western blots. Input control sequencing was performed on a sample that combined P67 Isolate and Tutored chromatin in equal proportions. To obtain sufficient chromatin to do four ChIPseq runs plus an Input control on the same sample, bilateral auditory forebrains from four individuals from each group were pooled. We also combined both auditory forebrains from four individuals for P32 ChIPseq data, and performed ChIP with the same antibodies at the same quantities as in the P67 ChIPseq, though we used 8 $\mu$ g of P32 chromatin. Input control was the P32 tissue pool. Reads were

obtained from NextSeq (Illumina, San Diego, CA). Chromatin isolation, ChIP, and DNA sequencing were performed at Active Motif (Carlsbad, CA).

Antibody-chromatin complexes were captured by the addition of protein G magnetic beads and the beads were washed once with IP dilution buffer, twice with wash buffer 1 (20 mM Tris-HCl pH 8, 2 mM EDTA, 1% Triton X-100, 0.1% SDS, 150 mM NaCl), once with wash buffer 2 (20 mM Tris-HCl pH 8, 2 mM EDTA, 1% Triton X-100, 0.1% SDS, 500 mM NaCl), once with wash buffer 3 (10 mM Tris-HCl pH 8, 1 mM EDTA, 250 mM LiCl, 1% NP-40, 1% deoxycholate), and once with TE (10 mM Tris-HCl pH 8, 1 mM EDTA). DNA-protein complex was eluted twice with 100  $\mu$ l elution buffer (25 mM Tris-HCl pH 7.5, 10 mM EDTA, 0.5% SDS) at 65°C for 15 min with shaking at 1200 rpm (Eppendorf ThermoMixer C). Eluted chromatin was treated with 10 mg of RNase A at 37°C for 1 h followed by proteinase K at 50°C for 2 h. Samples were then de-crosslinked at 65°C for 5 h. Reverse crosslinked DNA was purified by a PCR purification column (Qiaquick PCR purification, Qiagen), and eluted with 150  $\mu$ l of buffer EB (10 mM Tris-HCl pH 8) for qPCR. Small aliquots of input chromatin samples were reverse crosslinked, RNase A, proteinase K digested and purified with PCR purification columns as described above. The concentration of the purified DNA was measured with Qubit Fluorometric Quantitation (Invitrogen) as a reference for the amount of chromatin used in each ChIP reaction. ChIP and input DNA libraries were prepared for Illumina sequencing using all of the DNA from the ChIP reaction. Libraries were prepared using the standard consecutive enzymatic steps of end-polishing, dA-addition, and adaptor ligation. The adaptor-ligated libraries were amplified with barcoded primers for 15 cycles, then purified using Agencourt AMPure XP beads and quantified to assess quality of the amplification reactions.

## **ChIPseq analysis**

**Peak calling.** Single end 75 bp sequences (NextSeq500, Illumina) were mapped to the zebra finch genome assembly (Ensembl genebuild taeGut3.2.4) with BWA, using default settings to align untrimmed sequences uniquely, with no more than 2 mismatches, and duplicate reads were removed [10]. Only reads passing these criteria were inputted to SICER v1.1 to call peaks [11]. We set peak island window size to 200bp; gap size was set to 600bp for H3K9me3, H3K27me3, and RNA Pol2; gap size for H3K4me3 was 200bp; default settings for other parameters such as effective genome size (0.86) were employed [11, 12]. Peaks were called at a statistical cutoff compared to Input at 10E-5. We also used SICER to perform differential analysis between Isolate and Tutored samples for all four ChIPseq datasets with the same peak call parameters. Peaks were assigned to genes if they were within 10kb of NCBI gene models to capture genes adjacent to H3K9me3 and H3K27me3 peaks, which are typically found in intergenic regions (see Figure 1). For downstream differential gene-level analysis, we used the datasets of exclusive differential peaks with statistical threshold set at 10E-5, to allow for complexity of brain tissue composed of multiple cell types; we found <3% overlap of peaks between Isolate and Tutored datasets within a PTM or Pol2 run at this threshold, indicating specificity. NCBI genes were annotated for Ensembl gene and transcript identifiers, and Hugo Gene Nomenclature Consortium names (HGNC) with Biomart [13].

**Bioinformatic analysis of gene sets.** For GO and KEGG analysis, we converted Entrez gene IDs to Ensembl gene IDs to assay for significantly over- and under-represented categories or pathways. We used a custom algorithms for the zebra finch genome (<http://www.ark-genomics.org/tools/GOfinch>, [www.ark-genomics.org/tools/KEGGfinch](http://www.ark-genomics.org/tools/KEGGfinch));[14] with the Ensembl gene set v84 as the universe. GO output includes annotation for Molecular Function, Biological Process, and Cellular component hierarchies. To ask what protein classes and biological pathways were represented in the datasets, we entered HGNC

gene identifiers into [geneontology.org](http://geneontology.org) and obtained Panther Protein Classes. We tested if there were particular transcription factors predicted to bind to an overrepresented subset of the marked genes. We used a custom algorithm for Position Weight Matrices (PWM) built for analysis against the zebra finch assembly ([taeGut3.2.4](http://taeGut3.2.4)), using our datasets against the Ensembl transcript v84 universe [15]. We analyzed 5kb upstream/2kb downstream of predicted transcriptional start site (TSS), and, because the 5' ends of gene models are often truncated in the Ensembl models, 20kb upstream of the TSS and then combined outputs to generate a single list of uniquely overrepresented PWM for Isolate and Tutored genesets. The PWM analytical tool became inaccessible before Replicate 2 data were collected, thus we could not acquire a comparable output. As a prediction of how the PTMs and Pol2 transcription might be distributed across different cell types present in auditory forebrain, we used a database created from cell type-specific cultures to find which of our differential genes were among the top 100 genes that distinguish major cell types (neurons, astrocytes, microglia, myelinating oligodendrocytes, and endothelial cells; [http://web.stanford.edu/group/barres\\_lab/brain\\_rnaseq.html](http://web.stanford.edu/group/barres_lab/brain_rnaseq.html));[16]. To test for statistical differences between the Tutored and Isolate gene set populations, we calculated the Z-score for two population proportions, with  $\alpha < 0.05$ .

### **RNAseq**

For RNAseq analysis, we raised an independent set of Tutored and Isolate P67 males under the same conditions as the ChIPseq experiment. Eight auditory forebrain samples, each representing a single animal, were sequenced for each of the two groups. Total RNA libraries were constructed with Illumina oligo-dT primed TruSeq v2 RNA kits (Illumina) to generate 50nt single-end reads off an Illumina HiSeq2000. Raw read quality was assessed with FastQC ([www.bioinformatics.babraham.ac.uk/projects/fastqc/](http://www.bioinformatics.babraham.ac.uk/projects/fastqc/)), which showed scores above 32. Reads were trimmed with TrimGalore ([www.bioinformatics.babraham.ac.uk/projects/trim\\_galore/](http://www.bioinformatics.babraham.ac.uk/projects/trim_galore/)) and aligned to

the genome assembly (taeGut3.2.4) with TopHat 2.1 using default settings for nucleotide mismatches, gap distances, and intron size [17]. We ran HTSeq 0.6.1 (strandedness set for “no”; <https://htseq.readthedocs.io>) to count the number of reads aligned to gene models, then DESeq2 (v 1.18.1) to identify transcripts represented differentially in the Isolate compared to Tutored samples ( $\alpha < 0.05$ ; [18, 19]).

### **Immunohistochemistry and *in situ* hybridization**

**Brains.** We raised another set of P67 males under Tutored and Isolate conditions (n=5 Tutored, n=7 Isolate). At P67, birds were transcardially perfused, first with 0.1M phosphate-buffered saline (PBS) and then with 4% paraformaldehyde (PFA) in 0.025M PBS. Whole brains were dissected and post-fixed overnight in 4% PFA at 4°C. Brains were gelatin-embedded (8% gelatin in 0.1M PBS), and incubated overnight in PFA. Gelatin-embedded brains were cryoprotected by successive incubations in 15% and 30% sucrose in 0.1M PBS. A cryostat was used to section brains (20 $\mu$ m) in a series for molecular analysis of all genes/proteins across the ~1mm lateral extent of the auditory forebrain. Two series were thaw-mounted onto Superfrost Plus slides (Thermo Fisher; Waltham, MA USA) and stored at -80°C for *in situ* hybridization; the others were collected as free-floating sections in 0.1M PBS and stored at 4°C for immunohistochemistry.

**Molecular biology.** To label oligodendrocytes, we hybridized one series of thaw-mounted sections with a Digoxigenin (DIG)-labeled myelin proteolipid protein (PLP) antisense riboprobe. Riboprobes were *in vitro* transcribed from linearized *T.guttata* EST FE722130, and purified before use (RNeasy, Qiagen; Hilden, Germany). Slides with thaw-mounted sections were removed from -80°C, and processed for *in situ* hybridization as described previously [6, 20].



To label mature neurons, astrocytes, and endothelial cells we performed immunohistochemistry for NeuN, glutamine synthetase (GluL), and zona occludens-1 (ZO1), respectively. The primary antibodies used were: mouse anti-NeuN (EMD Millipore #MAB377; Burlington, MA, USA), mouse anti-GLUL (Atlas Antibodies # AMAb91103; Bromma, Sweden), and mouse anti-ZO-1 (Thermo Fisher #ZO1-1A12). Sections were permeabilized with 0.1 M PBS containing 0.03% Triton-X. After three, 10 minute washes with 0.1 M PBS containing 0.5% Tween-20 (PBST), endogenous peroxidases were exhausted with 2% H<sub>2</sub>O<sub>2</sub> in PBST. Sections were again washed (3x, for 10 minutes each) and blocked for 30 minutes at room temperature in 3% normal horse serum (NHS; Vector Laboratories, Cat# S-2000; Burlingame, CA, USA). Sections were incubated in primary antibody prepared in PBST containing 1% normal serum either overnight (NeuN, GluL) or for 48 hours (ZO1). Sections were washed 3x 10 minutes in PBST. For NeuN and GluL, sections were incubated for 2 hours at room temperature in biotinylated secondary antibodies prepared in PBST containing 1% normal serum (1:100; Vector Laboratories, Cat# BA-2000). After washing with PBST (3x, 10 minutes each), sections were incubated with avidin-biotin complex (ABC, Vector Laboratories, Cat# PK6100) for 30 minutes at room temperature. Following 0.1M PBS washes (3x, 10 minutes each), the peroxidase complex was visualized with DAB (Sigma-Aldrich USA) containing 0.003% H<sub>2</sub>O<sub>2</sub> in 0.1M PBS. Sections were mounted, dehydrated, cleared, and coverslipped with Permount (Thermo Fisher). For ZO1, sections were incubated for 2 hours in Dylight 488 Horse anti-mouse IgG secondary (1:100; Vector Laboratories Cat# DI2649) prepared in PBST containing 1% normal serum and DAPI at room temperature. Sections were then washed (3x 10 minutes in 0.1M PBS) mounted on Superfrost Plus slides (Thermo Fisher), dried overnight in the dark, and coverslipped with 2.5% PVA containing 0.5% DABCO.

**Image acquisition and analysis.** For NeuN, PLP, and ZO-1, images were captured using the 4X objective on an Olympus IX81 microscope (Olympus Corporation of the Americas, Center Valley, PA) with a

Hamamatsu Orca Flash 4.0 sCMOS camera (Hamamatsu Photonics, Skokie, IL) running Slidebook 5.0 software (Intelligent Imaging Innovations). For GluL, images were constructed from 40X digital image files created with a 3D Histech Panoramic Scan whole slide scanner and software (Perkin Elmer, Waltham, MA) equipped with a Stingray F146C color camera (Allied Vision Technologies, Stadroda, Germany).

Both cell density analysis (NeuN, PLP, and GluL) and measurements of the percent area stained (ZO1) were conducted using FIJI [21]. For cell density analysis, we obtained cell count numbers from intensity-thresholded images using the Analyze Particles command. Cell counts were divided by the area of the Region of Interest (ROI) selected (here, the boundaries of the auditory forebrain, which are visible in light microscopy images) to calculate a cell density measure. Because endothelial cells are grouped tightly together, we assessed the %Area that the ZO1 staining occupied, rather than a normalized cell count measure, in the ROI using the FIJI Measurement tool, after thresholding image intensities.

Measures were averaged across all sections for each bird to obtain an individual bird mean. T-tests with  $\alpha < 0.05$  were used to assess statistically significant differences between Tutored and Isolate measures for each cell type.

## SUPPLEMENTAL REFERENCES

1. Tchernichovski O., Nottebohm F., Ho C.E., Pesaran B., Mitra P.P. 2000 A procedure for an automated measurement of song similarity. *Anim Behav* **59**(6), 1167-1176. (doi:10.1006/anbe.1999.1416).
2. Ahmadiantehrani S., London S.E. 2017 Bidirectional manipulation of mTOR signaling disrupts socially mediated vocal learning in juvenile songbirds. *Proceedings of the National Academy of Sciences* **114**(35), 9463-9468. (doi:10.1073/pnas.1701829114).
3. London S.E., Clayton D.F. 2008 Functional identification of sensory mechanisms required for developmental song learning. *Nat Neurosci* **11**(5), 579-586. (doi:10.1038/nn.2103).
4. Yanagihara S., Yazaki-Sugiyama Y. 2016 Auditory experience-dependent cortical circuit shaping for memory formation in bird song learning. *Nature Communications* **7**, 11946. (doi:10.1038/ncomms11946 <http://www.nature.com/articles/ncomms11946#supplementary-information>).

5. Cheng H.Y., Clayton D.F. 2004 Activation and habituation of extracellular signal-regulated kinase phosphorylation in zebra finch auditory forebrain during song presentation. *J Neurosci* **24**(34), 7503-7513. (doi:10.1523/JNEUROSCI.1405-04.2004).
6. London S.E., Dong S., Replogle K., Clayton D.F. 2009 Developmental shifts in gene expression in the auditory forebrain during the sensitive period for song learning. *Dev Neurobiol* **69**(7), 437-450.
7. Vates G.E., Broome B.M., Mello C.V., Nottebohm F. 1996 Auditory pathways of caudal telencephalon and their relation to the song system of adult male zebra finches. *The Journal of comparative neurology* **366**(4), 613-642. (doi:10.1002/(SICI)1096-9861(19960318)366:4<AID-CNE5>3.0.CO;2-7).
8. Bauer E.E., Coleman M.J., Roberts T.F., Roy A., Prather J.F., Mooney R. 2008 A synaptic basis for auditory-vocal integration in the songbird. *J Neurosci* **28**(6), 1509-1522. (doi:10.1523/jneurosci.3838-07.2008).
9. Theunissen F.E., Amin N., Shaevitz S.S., Woolley S.M.N., Fremouw T., Hauber M.E. 2004 Song Selectivity in the Song System and in the Auditory Forebrain. *Annals of the New York Academy of Sciences* **1016**(1), 222-245. (doi:10.1196/annals.1298.023).
10. Li H., Durbin R. 2009 Fast and accurate short read alignment with Burrows-Wheeler transform. *Bioinformatics (Oxford, England)* **25**(14), 1754-1760. (doi:10.1093/bioinformatics/btp324).
11. Xu S., Grullon S., Ge K., Peng W. 2014 Spatial Clustering for Identification of ChIP-Enriched Regions (SICER) to Map Regions of Histone Methylation Patterns in Embryonic Stem Cells. *Methods in molecular biology (Clifton, NJ)* **1150**, 97-111. (doi:10.1007/978-1-4939-0512-6\_5).
12. Pepke S., Wold B., Mortazavi A. 2009 Computation for ChIP-seq and RNA-seq studies. *Nat Meth* **6**(11s), S22-S32.
13. Yates A., Akanni W., Amode M.R., Barrell D., Billis K., Carvalho-Silva D., Cummins C., Clapham P., Fitzgerald S., Gil L., et al. 2015 Ensembl 2016. *Nucleic Acids Research*. (doi:10.1093/nar/gkv1157).
14. Wu X., Watson M. 2009 CORNA: testing gene lists for regulation by microRNAs. *Bioinformatics (Oxford, England)* **25**(6), 832-833. (doi:10.1093/bioinformatics/btp059).
15. Blatti C., Sinha S. 2014 Motif enrichment tool. *Nucleic Acids Res* **42**(Web Server issue), W20-25. (doi:10.1093/nar/gku456).
16. Zhang Y., Chen K., Sloan S.A., Bennett M.L., Scholze A.R., O'Keefe S., Phatnani H.P., Guarnieri P., Caneda C., Ruderisch N., et al. 2014 An RNA-Sequencing Transcriptome and Splicing Database of Glia, Neurons, and Vascular Cells of the Cerebral Cortex. *The Journal of Neuroscience* **34**(36), 11929-11947. (doi:10.1523/jneurosci.1860-14.2014).
17. Kim D., Pertea G., Trapnell C., Pimentel H., Kelley R., Salzberg S.L. 2013 TopHat2: Accurate alignment of transcriptomes in the presence of insertions, deletions and gene fusions. *Genome biology* **14**(4). (doi:10.1186/gb-2013-14-4-r36).
18. Anders S., Pyl P.T., Huber W. 2015 HTSeq—a Python framework to work with high-throughput sequencing data. *Bioinformatics (Oxford, England)* **31**(2), 166-169. (doi:10.1093/bioinformatics/btu638).
19. Love M.I., Huber W., Anders S. 2014 Moderated estimation of fold change and dispersion for RNA-seq data with DESeq2. *Genome biology* **15**(12), 550. (doi:10.1186/s13059-014-0550-8).
20. Jin H., Clayton D.F. 1997 Localized changes in immediate-early gene regulation during sensory and motor learning in zebra finches. *Neuron* **19**(5), 1049-1059.
21. Schindelin J., Arganda-Carreras I., Frise E., Kaynig V., Longair M., Pietzsch T., Preibisch S., Rueden C., Saalfeld S., Schmid B., et al. 2012 Fiji: an open-source platform for biological-image analysis. *Nat Methods* **9**(7), 676-682. (doi:10.1038/nmeth.2019).
